# Supplementary material
Source: publisher figshare collection journal article supplement (https://gsajournals.figshare.com/ndownloader/files/12808259)
Supplement: Supplementary file 1 [file 12808259]

**Result S2. List of genes with differential expression between *wdr-23(mac35lf)* and *skn-1(mac53gf)* mutants.**

(*P* < 0.05 for each expression).

| **Gene name** | ***mac35* vs *WT*** | ***mac53* vs *WT*** | ***mac53* vs *mac35*** |
| --- | --- | --- | --- |
| **Log2FC** | **Log2FC** | **Log2FC** |
| *F28B4.3* | 1.723658313 | -1.68987736 | -3.399048595 |
| *F28H6.8* | 5.914444518 | 1.251584969 | -4.649599318 |
| *gst-30* | 9.564027276 | 7.30340205 | -2.244386492 |
| *gst-38* | 6.788615048 | 4.69182289 | -2.080795558 |
| *gst-40* | 6.294517759 | 2.576497813 | -3.699421417 |
| *R05D3.6* | — | — | — |
| *R09F10.1* | 1.17012897 | -2.760519595 | -3.913560955 |
| *srt-23* | 5.046426853 | 1.893972932 | -3.135908096 |
| *ugt-38* | 10.46259333 | 6.986982229 | -3.463717975 |
| *W08E12.4* | 0.079914893 | — | — |
| *Y73F8A.36* | 8.762270788 | 4.175331148 | -4.568910501 |
| *Y75B12A.2* | — | — | -6.149033525 |
|  |  |  |  |
| *F56A4.3* | -7.830561608 | 3.435575247 | 11.28243577 |
| *irld-35* | — | — | — |
| *irld-53* | — | — | — |
| *srbc-15* | -4.709233069 | 4.319817789 | 9.04506649 |

“—“: For *R05D3.6*, no expression was detected in wild type and *skn-1(mac53gf)*. For *W08E12.4*, no expression was detected in *skn-1(mac53gf)*. For *Y75B12A.2*, no expression was detected in wild type. For *irld-35* and *irld-53*, no expression was detected in wild type and *wdr-23(mac35lf)*.
